# Supplementary material
Source: ML conference proceedings conference paper supplement (https://openreview.net/forum?id=9L1BsI4wP1H)
Supplement: supplementary_material [file attachment]

noise\_L2\_norm = 0.0

noise\_L2\_norm = 0.125

Set Size

Set Size

Method

- HCC\_simple
- HCC\_smoothed\_classifier
- HCC\_smoothed\_score
- HCC\_smoothed\_score\_correction
- SC\_simple
- SC\_smoothed\_classifier
- SC\_smoothed\_score
- SC\_smoothed\_score\_correction

CNN sigma = 0.25

CNN sigma = 0.25

Classifier

Classifier">

| Method                        | noise_L2_norm = 0.0 (Set Size) | noise_L2_norm = 0.125 (Set Size) |
|-------------------------------|--------------------------------|----------------------------------|
| HCC_simple                    | ~1.45                          | ~1.50                            |
| HCC_smoothed_classifier       | ~1.24                          | ~1.28                            |
| HCC_smoothed_score            | ~1.24                          | ~1.29                            |
| HCC_smoothed_score_correction | ~1.54                          | ~1.62                            |
| SC_simple                     | ~1.63                          | ~1.69                            |
| SC_smoothed_classifier        | ~1.58                          | ~1.67                            |
| SC_smoothed_score             | ~1.57                          | ~1.67                            |
| SC_smoothed_score_correction  | ~2.05                          | ~2.19                            |
