# Supplementary material
Source: ML conference proceedings conference paper supplement (https://openreview.net/forum?id=9L1BsI4wP1H)
Supplement: supplementary_material [file attachment]

noise\_L2\_norm = 0.0

noise\_L2\_norm = 0.125

Marginal coverage

Marginal coverage

Method

- HCC\_simple
- HCC\_smoothed\_classifier
- HCC\_smoothed\_score
- HCC\_smoothed\_score\_correction
- SC\_simple
- SC\_smoothed\_classifier
- SC\_smoothed\_score
- SC\_smoothed\_score\_correction

CNN sigma = 0.0

CNN sigma = 0.0

Classifier

Classifier">

| Method                        | noise_L2_norm = 0.0 | noise_L2_norm = 0.125 |
|-------------------------------|---------------------|-----------------------|
| HCC_simple                    | ~0.91               | ~0.57                 |
| HCC_smoothed_classifier       | ~0.91               | ~0.57                 |
| HCC_smoothed_score            | ~0.91               | ~0.57                 |
| HCC_smoothed_score_correction | ~0.91               | ~0.57                 |
| SC_simple                     | ~0.91               | ~0.57                 |
| SC_smoothed_classifier        | ~0.91               | ~0.57                 |
| SC_smoothed_score             | ~1.00               | ~1.00                 |
| SC_smoothed_score_correction  | ~0.91               | ~0.57                 |
