# Supplementary material
Source: ML conference proceedings conference paper supplement (https://openreview.net/forum?id=9L1BsI4wP1H)
Supplement: supplementary_material [file attachment]

noise\_L2\_norm = 0.0

noise\_L2\_norm = 0.125

Conditional coverage

Conditional coverage

Method

- HCC\_simple
- HCC\_smoothed\_classifier
- HCC\_smoothed\_score
- HCC\_smoothed\_score\_correction
- SC\_simple
- SC\_smoothed\_classifier
- SC\_smoothed\_score
- SC\_smoothed\_score\_correction

CNN sigma = 0.0  
Classifier

CNN sigma = 0.0  
Classifier
