# Supplementary material
Source: ML conference proceedings conference paper supplement (https://openreview.net/forum?id=9L1BsI4wP1H)
Supplement: supplementary_material [file attachment]

noise\_L2\_norm = 0.0

noise\_L2\_norm = 0.125

Set Size

Set Size

Method

- HCC\_simple
- HCC\_smoothed\_classifier
- HCC\_smoothed\_score
- HCC\_smoothed\_score\_correction
- SC\_simple
- SC\_smoothed\_classifier
- SC\_smoothed\_score
- SC\_smoothed\_score\_correction

CNN sigma = 0.25

CNN sigma = 0.25

Classifier

Classifier">

| Method                        | noise_L2_norm = 0.0 (Median) | noise_L2_norm = 0.125 (Median) |
|-------------------------------|------------------------------|--------------------------------|
| HCC_simple                    | ~1.48                        | ~1.54                          |
| HCC_smoothed_classifier       | ~1.47                        | ~1.51                          |
| HCC_smoothed_score            | ~1.47                        | ~1.51                          |
| HCC_smoothed_score_correction | ~1.77                        | ~1.85                          |
| SC_simple                     | ~1.63                        | ~1.70                          |
| SC_smoothed_classifier        | ~1.61                        | ~1.66                          |
| SC_smoothed_score             | ~1.61                        | ~1.66                          |
| SC_smoothed_score_correction  | ~2.01                        | ~2.11                          |
