# Supplementary material
Source: ML conference proceedings conference paper supplement (https://openreview.net/forum?id=9L1BsI4wP1H)
Supplement: supplementary_material [file attachment]

noise\_L2\_norm = 0.0

noise\_L2\_norm = 0.25

Marginal coverage

Marginal coverage

Method

- HCC\_simple
- HCC\_smoothed\_classifier
- HCC\_smoothed\_score
- HCC\_smoothed\_score\_correction
- SC\_simple
- SC\_smoothed\_classifier
- SC\_smoothed\_score
- SC\_smoothed\_score\_correction

CNN sigma = 0.0

CNN sigma = 0.0

Classifier

Classifier">

| Method                        | noise_L2_norm = 0.0 (approx. coverage) | noise_L2_norm = 0.25 (approx. coverage) |
|-------------------------------|----------------------------------------|-----------------------------------------|
| HCC_simple                    | 0.91                                   | 0.95                                    |
| HCC_smoothed_classifier       | 0.91                                   | 0.95                                    |
| HCC_smoothed_score            | 0.91                                   | 0.95                                    |
| HCC_smoothed_score_correction | 0.91                                   | 0.95                                    |
| SC_simple                     | 0.91                                   | 0.38                                    |
| SC_smoothed_classifier        | 0.91                                   | 0.38                                    |
| SC_smoothed_score             | 0.91                                   | 0.38                                    |
| SC_smoothed_score_correction  | 0.91                                   | 0.38                                    |
